# Supplementary material
Source: PubMed Central journal article supplement (PMC3697327)
Supplement: AAC.02498-12_zac999101916so1.pdf [file AAC.02498-12_zac999101916so1.pdf]

## Supplementary Information

### Hydramacin-1 in Action – Scrutinising the Barnacle Model

Matthias Michalek<sup>1</sup>, Bruno Vincent<sup>1</sup>, Rainer Podschun<sup>2</sup>, Joachim Grötzinger<sup>3</sup>, Burkhard

Bechinger<sup>1</sup>, Sascha Jung<sup>3#</sup>

<sup>1</sup> Université de Strasbourg/CNRS, UMR7177, Institut de Chimie, 1, rue Blaise Pascal, 67070

Strasbourg, France

<sup>2</sup> Institute for Infection Medicine, University Hospital Schleswig-Holstein, Campus Kiel, 24105

Kiel, Germany

<sup>3</sup> Institute of Biochemistry, Christian-Albrechts-Universität zu Kiel, Olshausenstr. 40, 24098

Kiel, Germany

**#Corresponding author:** Sascha Jung, Institute of Biochemistry, Christian-Albrechts-Universität zu Kiel, Olshausenstr. 40, 24098 Kiel, Germany, Tel.: ++49 431 8805354, FAX: ++49 431 8802007, [sjung@biochem.uni-kiel.de](mailto:sjung@biochem.uni-kiel.de)

**Table SI1: Antimicrobial activity of HM1 against several Gram-negative and Gram-positive bacteria.** Values are depicted in  $\mu\text{M}$  derived from references (5) and (30). The aggregation column shows whether aggregation was detected (+) or not detected (-) after administration of HM1.

|                                     | <b>MBC</b> | <b>LD90</b> | <b>Aggregation</b> |
|-------------------------------------|------------|-------------|--------------------|
| <b>Gram-negative bacteria</b>       |            |             |                    |
| <i>C. freundii</i> NCTC 9750        | 7.1        | 0.9         | +                  |
| <i>B. cepacia</i> ATCC 17759        | >14.3      | >14.3       | -                  |
| <i>E. coli</i> ATCC 25922           | 0.9        | 0.2         | +                  |
| <i>K. pneumoniae</i> ATCC 13883     | 0.9        | 0.5         | +                  |
| <i>P. mirabilis</i> ATCC 21100      | 14.3       | 0.9         | -                  |
| <i>Ps. aeruginosa</i> NCTC 11446    | >14.3      | 14.3        | +                  |
| <i>S. marcescens</i> NCTC 10211     | >14.3      | 1.8         | +                  |
| <i>Y. enterocolitica</i> NCTC 11176 | 0.9        | 0.2         | +                  |
| <b>Gram-positive bacteria</b>       |            |             |                    |
| <i>S. aureus</i> ATCC 6538          | >14.3      | >14.3       | +                  |
| <i>S. hemolyticus</i> ATCC 29970    | 1.8        | 0.9         | -                  |
| <i>B. megaterium</i> ATCC 14581     | 0.2        | 0.1         | +                  |
| <i>E. faecalis</i> ATCC 29212       | 14.3       | 0.9         | +                  |
| <i>S. epidermidis</i> ATCC 14990    | >14.3      | >14.3       | +                  |
| <i>S. hominis</i> ATCC 27844        | >14.3      | 3.6         | -                  |
| <i>S. pneumoniae</i> ATCC 33400     | >14.3      | >14.3       | -                  |
| <i>Str. pyogenes</i> ATCC 12344     | >14.3      | 7.1         | +                  |

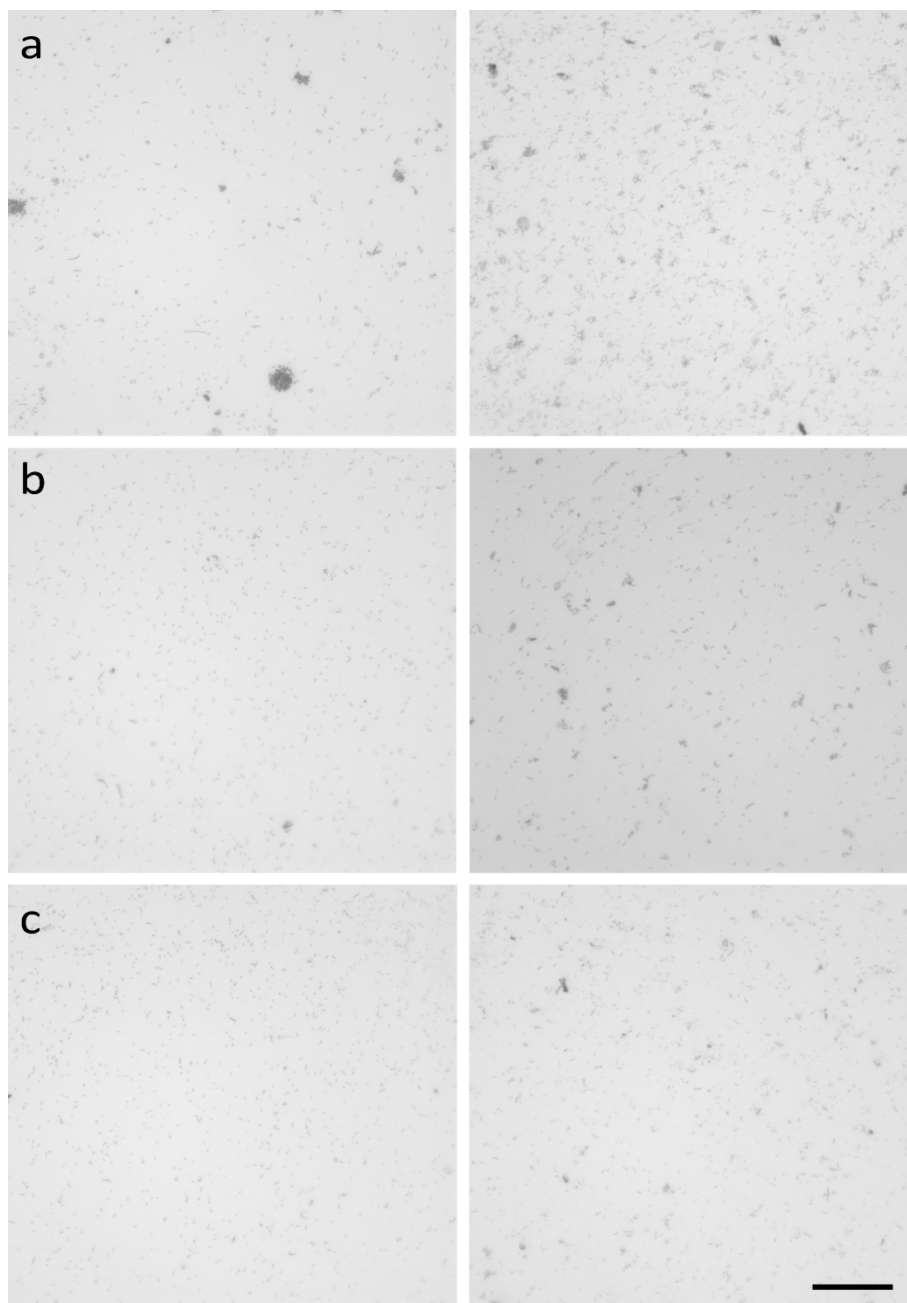

Figure SI 1

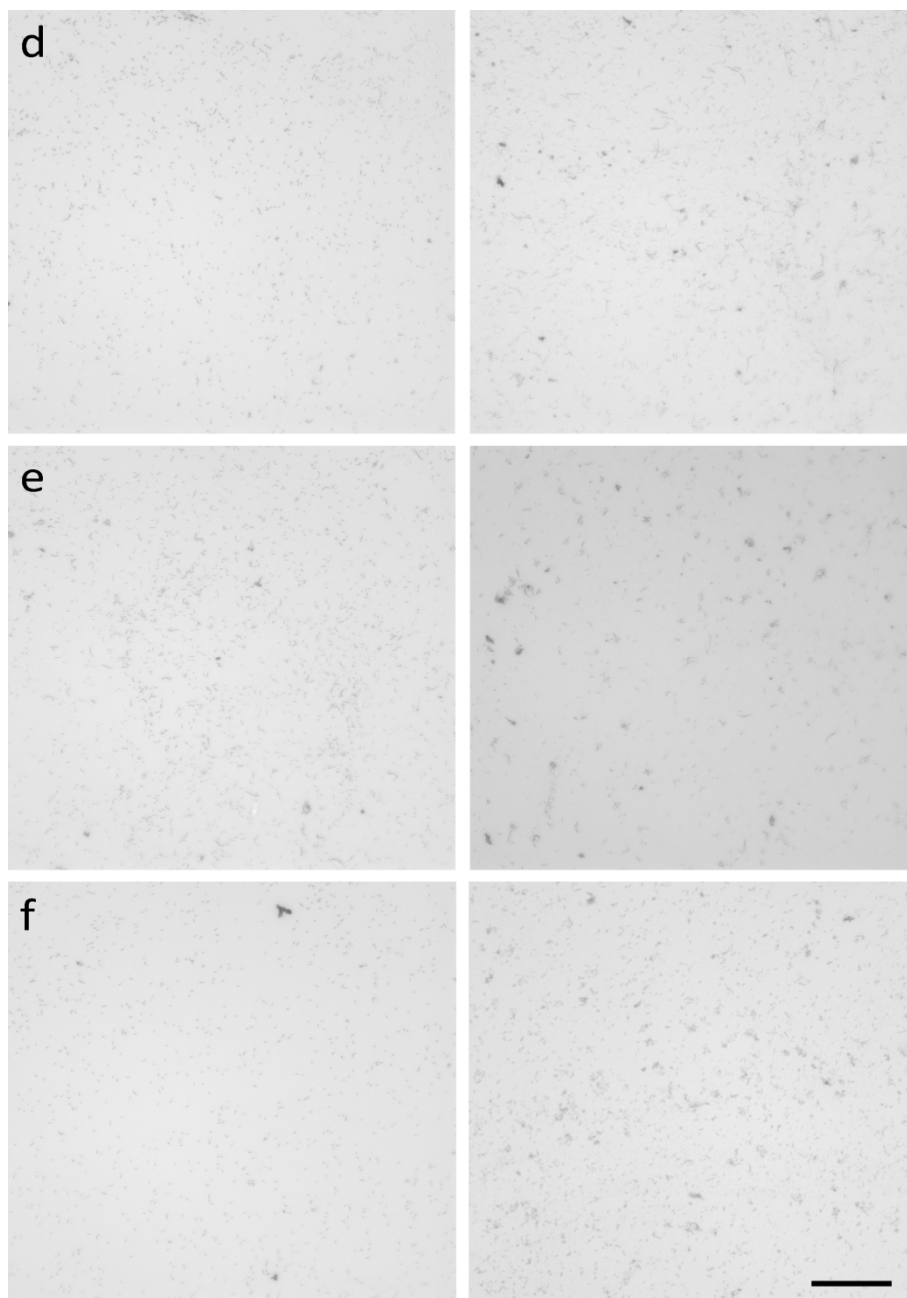

Figure SI 1

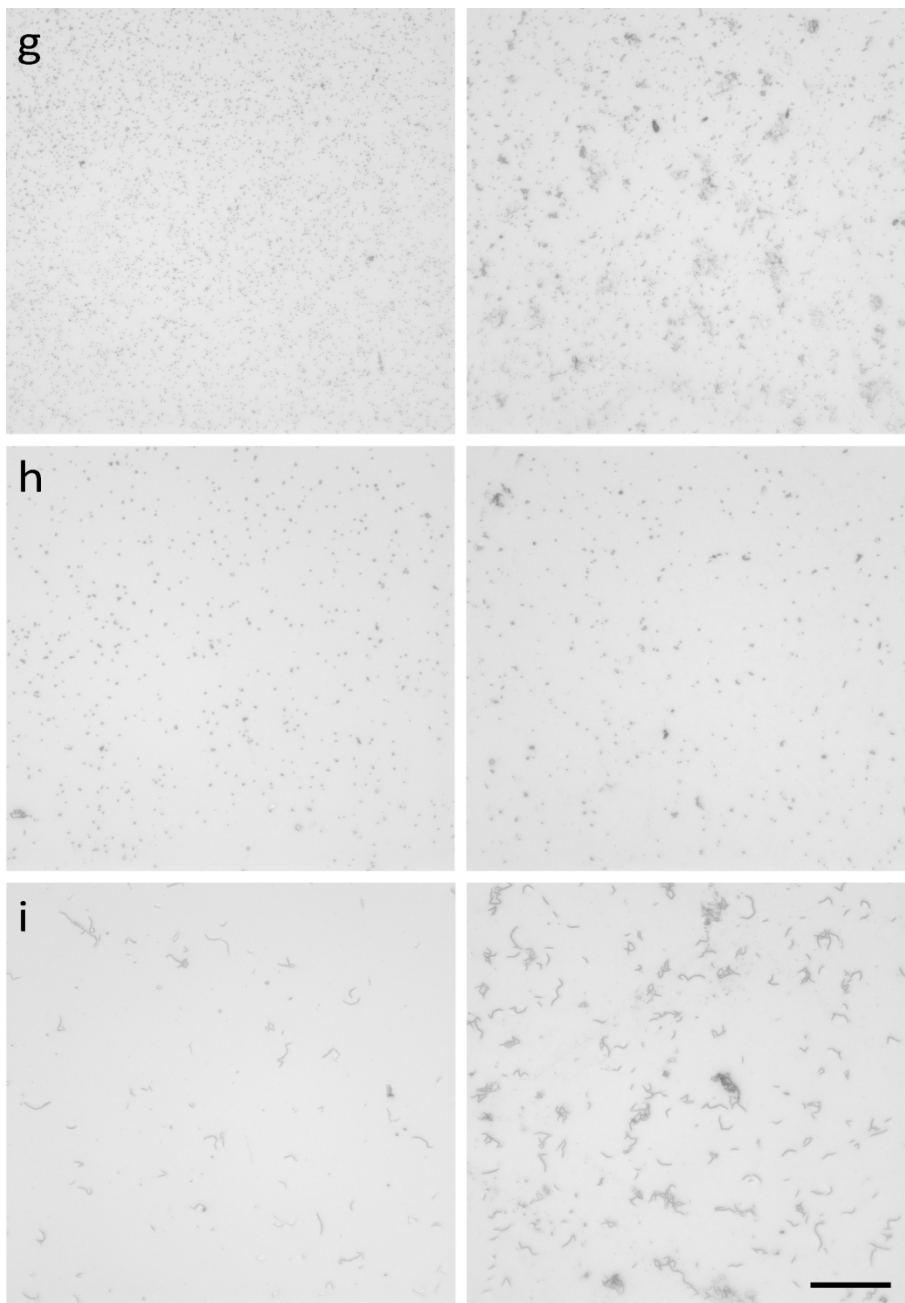

Figure SI 1

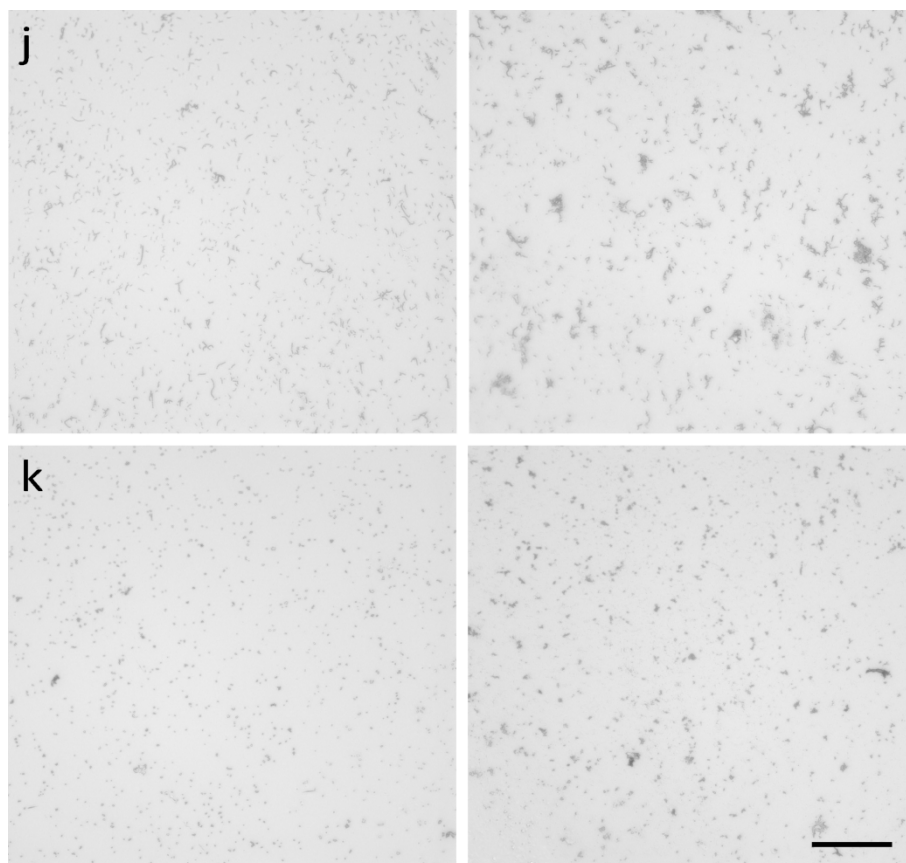

**Figure SI 1: Aggregation of bacteria by HM1** – Depicted are the micrographs of several Gram-negative and Gram-positive bacteria in absence (left panels) or presence (right panels) of sub-lethal dosages of HM-1 after 10 min of incubation. HM1 led to the formation of cell aggregates of (a) *C. freundii* NCTC 9750, (b) *K. pneumoniae* ATCC 13883, (d) *Ps. aeruginosa* NCTC 11446, (e) *S. marcescens* NCTC 10211, (f) *Y. enterocolitica* NCTC 11176, (g) *S. aureus* ATCC 6538, (i) *B. megaterium* ATCC 14581, (j) *E. faecalis* ATCC 29212, and (k) *S. epidermidis* ATCC 14990. In comparison, untreated control samples (left panels) show a uniform distribution of bacterial cells. (c) displays *P. mirabilis* ATCC 21100 as representative for Gram-negative bacteria and (h) shows *S. hemolyticus* ATCC 29970 as representative for Gram-positive bacteria which did not show cell aggregation in presence of HM1. Black bar = 100  $\mu\text{m}$ .
